# Supplementary material for: Comparison of different correction formulas and measurement methods for the accurate determination of intraocular pressure after SMILE and FS-LASIK surgery
Source: BMC Ophthalmol. 2022 Oct 10;22:404. doi: 10.1186/s12886-022-02620-7 (PMC9549448; doi:10.1186/s12886-022-02620-7)
Supplement: Supplementary file 1 — Additional file 1. [file 12886_2022_2620_MOESM1_ESM.xlsx]

## Sheet: Sheet1
Operative Method	Gender	Patient	Age	Preoperative							Postoperative							Sphere	Cylinder	Spherical Equivalent
				NCT1	Ehlers1	Dresden1	Orsseng1	Kohlhaas1	Shah1	Corvis1	NCT2	Ehlers2	Dresden2	Orssengo2	Kohlhaas2	Shah2	Corvis2
SMILE	Female	1A	25	12.8	14.6	14.1	13.8112	14	14.4	15.6	10	18.1	14.8	14.05	13.9	16	14.3	-3.75	-0.25	-3.75
SMILE	Female	1B	25	12.7	14.5	13.9	13.6779	13.8	14.3	14.9	9	16.7	13.5	12.42	12.5	14.7	14	-3.75	-0.25	-3.75
SMILE	Female	2A	23	14.7	15.3	15.3	14.9205	15	15.4	17.2	11	18.6	15.5	15.136	14.2	16.6	15.1	-4.75	-1	-5.25
SMILE	Female	2B	23	14	14.3	14.4	14.07	14.4	14.5	15.8	11	17.5	14.8	14.421	13.9	15.8	12.6	-4	-1	-4.5
SMILE	Female	3A	26	15.1	13.4	14.3	14.3601	15.9	14.1	13.9	11	18.2	15.2	14.707	15.8	16.3	14.7	-7	-0.5	-7.25
SMILE	Female	3B	26	14.5	12.3	13.2	13.543	15.2	13.2	15.3	15	21.7	19	19.755	19.6	20	15	-7	-0.5	-7.25
SMILE	Female	4A	28	14.5	14.9	14.9	14.7755	15.4	15	14	13	16.5	15.2	15.119	15.5	15.7	15.3	-2.75	0	-2.75
SMILE	Female	4B	28	12.8	12.5	12.8	12.7488	13.6	12.9	14	14	18	16.4	16.618	16.7	17.1	15	-2.5	-0.25	-2.5
SMILE	Female	5A	37	16.3	15.6	16.1	15.8925	16.8	16	14.8	13.1	17.6	15.8	15.8379	15.7	16.5	15.1	-2.75	-1	-3.25
SMILE	Female	5B	37	16.2	15.6	16.1	15.957	16.9	16	16.6	11.1	15	13.5	13.098	13.4	14.1	13.6	-2	-1	-2.5
SMILE	Male	6A	21	15.9	14.6	15.4	15.4866	17.3	15.2	17	11	18.4	15.4	14.707	16.4	16.5	16	-7.75	-0.25	-7.5
SMILE	Male	6B	21	14.9	13.5	14.3	14.453	16.3	14.1	15.2	10	16.7	14	13.05	15	15	14	-7	-0.25	-6.75
SMILE	Male	7A	27	16.9	16.2	16.7	16.6465	17.9	16.6	16.2	10	15.4	13.2	12.56	13.7	14.1	16	-5	-0.25	-5
SMILE	Male	7B	27	16	15.1	15.7	15.712	17	15.6	16	9	14.3	12.2	11.241	12.7	13	15.9	-4.75	-0.25	-4.75
SMILE	Female	8A	24	18.1	18.5	18.5	18.0457	18	18.7	14.3	8	16.2	12.8	11.312	11.5	14.1	13	-7.25	-0.25	-7.25
SMILE	Female	8B	24	18.1	18.2	18.3	17.8285	18	18.4	15.1	8	15.7	12.6	11.072	11.2	13.7	13	-6.5	0	-6.5
SMILE	Male	9A	32	15.2	13.8	14.6	14.44	15.5	14.4	13.9	8	13.8	11.4	10.2	11.4	12.3	11.3	-4.75	-0.75	-5
SMILE	Male	9B	32	14.5	12.6	13.6	13.572	14.9	13.4	14.2	7	13.6	10.9	9.219	11.1	11.9	9.8	-5.75	-1.5	-6.75
SMILE	Female	10A	27	14.6	14.8	14.9	14.673	15.1	15	13.6	11	16.6	14.4	13.926	13.9	15.2	17.4	-3	-0.5	-3.25
SMILE	Female	10B	27	14.5	14.7	14.8	14.529	14.9	14.9	14.1	15	20.8	18.4	19.095	17.8	19.3	17.5	-3.5	-0.5	-3.75
SMILE	Female	11A	23	20	17.7	18.9	18.24	19.8	18.6	15.8	13	19.7	17	17.212	16.5	18	16.1	-7.25	-0.25	-7.25
SMILE	Female	11B	23	21.8	19.4	20.6	19.7944	21.6	20.3	16.5	15	21.2	18.7	19.455	18.2	19.6	16.4	-5.5	-1.75	-6.25
SMILE	Female	12A	33	14	13.1	13.7	13.51	14.4	13.6	16.5	11	15	13.4	13.035	13.4	14.1	15.2	-3.25	0	-3.25
SMILE	Female	12B	33	18.2	17.6	18	17.7814	18.7	18	15.3	10	14.2	12.6	11.95	12.6	13.2	15.9	-3.25	-0.25	-3.25
SMILE	Female	13A	25	16.4	12.7	14.5	14.4484	16.5	14	18.5	10	13.3	12	11.57	13.1	12.6	13.4	-5.25	-0.5	-5.5
SMILE	Female	13B	25	16.3	12.3	14.3	14.2136	16.3	13.7	19	12	15.6	14.2	14.04	15.2	14.8	12.9	-5.5	-0.5	-5.75
SMILE	Female	14A	21	13	15.7	14.7	14.469	14.3	15.2	17	11	18.7	15.6	15.224	14.4	16.7	14.3	-3.5	-0.5	-3.75
SMILE	Female	14B	21	14.3	16.7	15.9	15.8015	15.7	16.3	16.9	12	18.5	15.8	15.744	15.2	16.8	14.6	-3	-0.5	-3.25
SMILE	Female	15A	22	21.8	20.4	21.2	20.4702	21.7	21	18	10	17.5	14.4	13.71	13.7	15.6	17	-6.75	-0.25	-6.75
SMILE	Female	15B	22	19.8	19	19.6	19.008	19.8	19.5	17.6	12	18.5	15.8	15.744	15.1	16.8	15.2	-5.25	-0.5	-5.5
SMILE	Female	16A	29	14.2	15.5	15.2	15.0662	15.5	15.4	15.6	10	17.7	14.6	13.83	14	15.7	14	-4.5	0	-4.5
SMILE	Female	16B	29	14.8	15.9	15.6	15.5548	16.1	15.8	15.3	8	15.2	12.3	10.824	12	13.4	14.9	-4.75	0	-4.75
SMILE	Male	17A	18	20.7	13.8	17	16.4565	20.4	16.1	18.7	15	14.9	15.2	15.345	17.2	15.2	15.4	-3	-1.5	-3.75
SMILE	Male	17B	18	18.7	12	15.1	14.9039	18.2	14.2	16.3	14	13.4	13.8	14.042	16.1	13.8	14.8	-3.25	-1	-3.75
SMILE	Female	18A	35	13.8	13.7	14	13.7586	14.4	14	13.2	11	17	14.6	14.135	14	15.5	15.7	-4	-0.25	-4
SMILE	Female	18B	35	14.1	14.1	14.3	14.0718	14.6	14.4	13.5	10	16	13.6	12.89	13	14.5	14.1	-4.25	-0.25	-4.25
SMILE	Female	19A	28	14.9	16.3	15.9	15.7195	15.7	16.2	15.8	11	19.6	16	15.752	15.3	17.3	14.3	-6.75	-1.25	-7.25
SMILE	Female	19B	28	14.2	15.7	15.2	15.052	15.2	15.5	16.6	10	18	14.7	13.98	14.2	15.9	13.3	-5.75	-1.5	-6.5
SMILE	Female	20A	34	16.5	16.4	16.7	16.434	17	16.7	14.8	12	16	14.5	14.208	14.1	15.1	13.6	-2	-0.5	-2.25
SMILE	Female	20B	34	17.4	17.3	17.5	17.226	17.7	17.6	14.8	16	19.8	18.4	18.704	17.7	19	14.6	-1.75	-0.25	-1.75
SMILE	Female	21A	31	18.3	18.8	18.8	18.6294	18.9	18.9	17.1	9	16.8	13.6	12.474	13	14.8	14.2	-5.25	-1.5	-6
SMILE	Female	21B	31	15.5	16.1	16.1	15.872	16.2	16.2	16.1	10	18	14.7	13.95	14.1	15.9	13.6	-5.75	-1	-6.25
SMILE	Male	22A	19	15.7	16.3	16.3	15.8413	15.8	16.4	13.8	12	19.4	16.4	16.368	15.3	17.5	16.1	-6.25	-0.5	-6.5
SMILE	Male	22B	19	15.6	15.8	15.9	15.5064	15.6	16	16	10	17.7	14.6	13.84	13.5	15.7	15.7	-5.75	-1	-6.25
SMILE	Male	23A	18	15.7	14.4	15.2	14.9464	15.9	15	15.3	11	16.3	14.2	13.739	14	15	15.6	-4	-1	-4.5
SMILE	Male	23B	18	20.2	18.6	19.5	19.0688	20.5	19.3	14.6	13	17.3	15.6	15.6	15.7	16.3	14.8	-3.75	-0.25	-3.75
SMILE	Female	24A	24	15.4	13.8	14.7	14.2758	15.1	14.5	17.3	12	16	14.5	14.172	13.9	15.1	13.3	-3.75	-0.5	-4
SMILE	Female	24B	24	14.9	13.8	14.5	14.1103	14.7	14.4	16	10	13.9	12.4	11.75	11.9	13	14.5	-4	0	-4
SMILE	Female	25A	37	13.6	15	14.6	14.4432	14.8	14.9	16.6	13	19.7	17	17.264	16.4	18	13	-4	-0.5	-4.25
SMILE	Female	25B	37	13.9	16.1	15.3	15.2344	15.3	15.7	15.6	7	14.6	11.5	9.632	10.7	12.6	14.9	-4	-0.5	-4.25
SMILE	Female	26A	28	15.2	15.2	15.4	15.1088	15.5	15.5	16.5	13	21.2	17.8	18.317	16.9	19	15.5	-5.75	-1.25	-6.25
SMILE	Female	26B	28	16	15.7	16	15.664	16.1	16.1	15.1	12	20.7	17.1	17.328	16	18.4	13.4	-6.25	-1.5	-7
SMILE	Male	27A	20	14.7	14.6	14.8	14.4942	14.9	14.9	18.8	11	16.6	14.4	13.882	13.5	15.2	16.1	-3.5	-0.5	-3.75
SMILE	Male	27B	20	14.7	14.2	14.6	14.3472	14.9	14.6	17.8	11	16.3	14.2	13.728	13.4	15	15.8	-2.5	-1	-3
SMILE	Male	28A	18	14.2	12.9	13.7	13.6036	14.7	13.5	15.7	13	18.3	16.2	16.289	16.2	17	15.2	-3.75	-1.25	-4.25
SMILE	Male	28B	18	13.3	12.4	13	12.8877	13.8	12.9	15	9	14.2	12.1	11.214	12.1	12.9	13.5	-3.5	-1.75	-4.25
SMILE	Female	29A	32	15.1	18	16.9	16.7308	15.8	17.4	17.1	12	19.7	16.5	16.524	14.8	17.7	17.2	-4.25	0	-4.25
SMILE	Female	29B	32	16.1	18.4	17.6	17.2914	16.4	18	15.8	13	20.9	17.6	18.083	15.9	18.8	17.9	-4.75	-0.25	-4.75
FS-LASIK	Male	30A	21	18.2	19.5	19.2	19.2	19.1	19.4	15.1	14	22.6	19	20	18.5	20.3	15.4	-6.75	-0.75	-7
FS-LASIK	Male	30B	21	19.5	20.7	20.4	20.5	20.4	20.6	16.8	13	21.2	17.8	18.3	17.3	19.1	14.6	-5.75	-0.75	-6
FS-LASIK	Female	31A	21	16.4	15.1	15.8	15.8	17.4	15.7	16.7	11	18.2	15.3	14.7	16	16.4	15.5	-6	-2	-7
FS-LASIK	Female	31B	21	17.8	16.1	17	17	18.8	16.8	17.7	13	20.2	17.3	17.4	18	18.4	16	-6	-2.5	-7.25
FS-LASIK	Male	32A	30	11.2	13.6	12.8	12.3	12.1	13.2	14.5	8	14.9	12.1	10.7	11.1	13.1	13.7	-4.25	-0.25	-4.25
FS-LASIK	Male	32B	30	11.1	13.9	12.9	12.4	12.1	13.4	13.7	8	15.1	12.2	10.8	11.3	13.3	12.4	-4.75	0	-4.75
FS-LASIK	Female	33A	31	13.5	15.2	14.7	14.2	13.7	15	17.1	14	22.4	19	20	17.3	20.2	16.7	-6	-0.25	-6
FS-LASIK	Female	33B	31	16	17.7	17.2	16.7	16	17.5	16.2	13	19.9	17.1	17.2	15	18.1	15.1	-2.25	-2.25	-3.25
FS-LASIK	Female	34A	23	13.7	14.8	14.5	14.4535	15	14.8	18.9	10	17.3	14.3	13.55	14.2	15.4	16.1	-5.25	-0.25	-5.25
FS-LASIK	Female	34B	23	13.5	15.1	14.6	14.4855	14.8	14.9	18.3	7	15.2	11.8	9.821	11.5	13	11.1	-6	-0.5	-6.25
FS-LASIK	Male	35A	22	17.6	19.2	18.7	18.9376	19.1	19	18.3	11	18.8	15.6	15.158	15.7	16.8	16	-7	-0.25	-7
FS-LASIK	Male	35B	22	16.1	18.2	17.5	17.6617	17.7	17.9	21.7	11	18.5	15.4	14.96	15.5	16.5	15.1	-6	-1	-6.5
FS-LASIK	Female	36A	25	18.1	19.4	19	19.0231	19	19.3	17.1	14	22	18.7	19.558	18.3	19.9	17.9	-7	-0.5	-7.25
FS-LASIK	Female	36B	25	17.9	19	18.7	18.6876	18.7	19	16.8	15	22	19.2	20.145	18.7	20.2	18.3	-6	-0.5	-6.25
FS-LASIK	Male	37A	19	16.5	16.1	16.5	16.3515	17.3	16.4	18.4	16	20.2	18.6	19.168	19.1	19.2	16.1	-4	0	-4
FS-LASIK	Male	37B	19	15.4	14.7	15.2	15.1074	16.2	15.1	17.4	19	23.5	21.8	23.085	22.2	22.5	15.8	-4.25	-0.5	-4.5
FS-LASIK	Female	38A	27	15.3	17	16.5	16.3863	16.4	16.8	15.5	7	16.7	12.7	10.458	12.1	14.1	14.1	-7.5	-1	-8
FS-LASIK	Female	38B	27	14.3	16	15.5	15.2867	15.3	15.8	15.8	10	17.9	14.6	13.89	14.2	15.8	13.1	-6	-0.5	-6.25
FS-LASIK	Female	39A	24	16.1	14.4	15.3	14.9086	15.8	15.1	15.7	10	12.4	11.6	13.89	14.2	12	13.8	-3.75	-0.25	-3.75
FS-LASIK	Female	38B	24	15.5	13.8	14.7	14.291	15.1	14.5	14.8	9	11.1	10.4	9.837	10.4	10.8	11.4	-3.25	-0.25	-3.25
FS-LASIK	Male	40A	21	17.3	19.2	18.6	18.1823	17.3	18.9	16.9	15	22.8	19.6	20.805	17.9	20.8	18.3	-6.5	-1	-7
FS-LASIK	Male	40B	21	17.4	18.4	18.2	17.661	17.2	18.4	16.9	13	21.6	18	18.668	16.3	19.3	17.5	-6.25	-1.75	-7
FS-LASIK	Female	41A	26	14.9	16.7	16.1	15.9132	15.6	16.5	18.1	9.5	18.4	14.7	13.8415	13.6	16.1	14.7	-5.5	-1.75	-6.25
FS-LASIK	Female	41B	26	13.5	15.1	14.6	14.2425	14	14.9	17.1	9	17.9	14.2	13.068	13.1	15.5	13.6	-6.75	-0.75	-7
FS-LASIK	Male	42A	24	19.8	18.7	19.4	18.9882	20.1	19.3	17.8	13	20.5	17.4	17.771	17.3	18.6	17.3	-8	-1.25	-8.5
FS-LASIK	Male	42B	24	19.2	18.4	19	18.6048	19.5	18.9	19	14	20.8	18	18.606	18	19.1	16.9	-8	-1.25	-8.25
FS-LASIK	Female	43A	22	11.7	13.9	13.1	12.7881	12.9	13.5	13.8	15	23.8	20.2	21.69	19.2	21.5	13.7	-5.5	-0.25	-5.5
FS-LASIK	Female	43B	22	13.4	15	14.5	14.3514	14.6	14.8	16	13	21.7	18.1	18.733	17.3	19.4	13.8	-6	-0.25	-6
FS-LASIK	Female	44A	35	15.7	16.4	16.3	15.8727	15.8	16.5	16.2	11	19.7	16.1	15.906	14.6	17.4	13.6	-6.25	-3	-7.75
FS-LASIK	Female	44B	35	15.1	15.4	15.5	15.0547	15.2	15.6	15.7	11	18	15.2	14.762	14	16.2	15.2	-4.25	-2.5	-5.5
FS-LASIK	Female	45A	32	13	14.2	13.9	13.273	12.8	14.1	11.2	8	16.5	13	11.424	10.6	14.3	11.8	-2.75	-3.5	-4.5
FS-LASIK	Female	45B	32	10.5	11.8	11.5	10.752	10.2	11.7	12.2	8	16.5	13	11.44	10.8	14.3	10.2	-4.25	-2.25	-5.25
FS-LASIK	Male	46A	23	20	17.5	18.8	18.24	20	18.5	21.9	17	22.5	20.3	21.403	20.8	21.1	20.6	-7	-1.75	-7.75
FS-LASIK	Male	46B	23	18	15.5	16.8	16.47	18.2	16.5	19.7	19	24.5	22.3	23.921	22.8	23.1	17.1	-7.25	-1.5	-8
FS-LASIK	Female	47A	32	15.6	16.7	16.4	16.1772	16.2	16.6	17.2	12	19.8	16.6	16.632	16.1	17.8	15	-7.25	-1	-7.75
FS-LASIK	Female	47B	32	14.8	16.2	15.8	15.614	15.6	16.1	16.9	9	16.8	13.6	12.474	13.1	14.8	12	-7	-0.75	-7.25
FS-LASIK	Female	48A	28	16.5	18.6	17.9	17.985	17.7	18.3	18.1	11	17.7	15	14.564	14.4	16	17.5	-4	-1.25	-4.5
FS-LASIK	Female	48B	28	17.1	19.2	18.5	18.7587	18.4	19	17.5	13	19.5	16.9	17.108	16.5	17.9	17.5	-4	-1.25	-4.5
FS-LASIK	Female	49A	29	18.2	15.1	16.7	16.107	17.8	16.3	17.3	14	20.2	17.7	18.144	17.7	18.6	20.2	-7	-2.25	-8
FS-LASIK	Female	49B	29	16.8	14.3	15.6	15.2376	16.7	15.3	18	18	22.6	20.8	21.924	21.1	21.5	18.6	-5	-2.75	-6.25
